# Supplementary material for: Delineating the Origins of Vibrio parahaemolyticus Isolated from Outbreaks of Acute Hepatopancreatic Necrosis Disease in Asia by the Use of Whole Genome Sequencing
Source: PubMed Central journal article supplement (PMC5712426; doi:10.3389/fmicb.2017.02354), 2017-11-28
Supplement: Image1.pdf [file Image1.pdf]

## *Supplementary Material*

### **Delineating the origins of *Vibrio parahaemolyticus* isolated from outbreaks of acute hepatopancreatic necrosis disease in Asia by the use of whole genome sequencing**

Songzhe Fu<sup>1,2</sup>, Huiqin Tian<sup>3</sup>, Dawei Wei<sup>4</sup>, Xiaojun Zhang<sup>5</sup>, Ying Liu<sup>1,6</sup>

1. College of Marine Technology and Environment, Dalian Ocean University, Dalian, 116023, China
2. Nanchang Center for Disease Control and Prevention, Nanchang, 330038, China
3. Institute of Oceanology, Chinese Academy of Sciences, Qingdao, 266071, China
4. College of Life Science, Northwest Agriculture and Forestry University, Yangling, 712100, China
5. College of animal science and technology, Yangzhou University, Yangzhou, 225009, China
6. Nantong R&D Center, Chinese Academy of Sciences, Nantong, 226019, China

\* **Correspondence:** Corresponding Author: E-mail: [fusongzhe@hotmail.com](mailto:fusongzhe@hotmail.com)

#### **1 Supplementary text**

##### **Uneven role of recombination in *V. parahaemolyticus***

Recombination events were identified using RDP3 (Martin and Rybicki, 2000). Seven algorithms, including GENECONV, Bootscan, MaxChi, Chimaera, SiScan, original RDP and 3Seq were employed to detect recombinant signals, simultaneously. Recombinant segments were confirmed only if recombinant signals were detected by at least three algorithms for a particular sequence.

Results showed the relationship between high SNP density and recombination events. Overall, 201 kb region in the studied genomes were attributed to homologous recombination. There were 112 recombination events in 201 kb region which introduced 19,767 SNPs.

Most of the likely recombination sites were located within a 160 kb region (2,562,679–2,725,178 in chromosome I) which was surrounded around the O- and K-antigen encoding gene cluster (Supplementary Figure 2). Our results were consistent with a previous study which also found a high proportion of recombination regions in O- and K-antigen (Cui et al., 2013). Some of recombination were probably imported from other serovars of *V. parahaemolyticus* and led to serovar shift events.

Most of the recombination regions in the genome contained a high frequency of SNPs but there were also a few of long regions with low SNPs density. However, these recombination events were rare.

### **Prophage diversity of sequenced strains**

The nine sequenced strains exhibited differences in prophages, plasmids, and antibiotic resistance genes profiles. In total, 14 prophages or prophage remnants, including VfO3K6, VCY\_phi, 12B8, VFJ, 12B12 and VEJphi, were identified among the nine *V. parahaemolyticus* genomes (Table S4).

### **Reference**

- Cui, Y., Yang, X., Didelot, X., Guo, C., Li, D., Yan, Y., Zhang, Y., Yuan, Y., Yang, H., Wang, J., Wang, J., Song, Y., Zhou, D., Falush, D. and Yang, R. (2015) Epidemic clones, oceanic gene pools, and eco-ld in the free living marine pathogen *Vibrio parahaemolyticus*. *Mol Biol Evol.* 32, 1396-410. doi: 10.1093/molbev/msv009.
- Martin, D. and Rybicki, E. (2000) RDP: detection of recombination amongst aligned sequences. *Bioinformatics.* 16, 562-3.



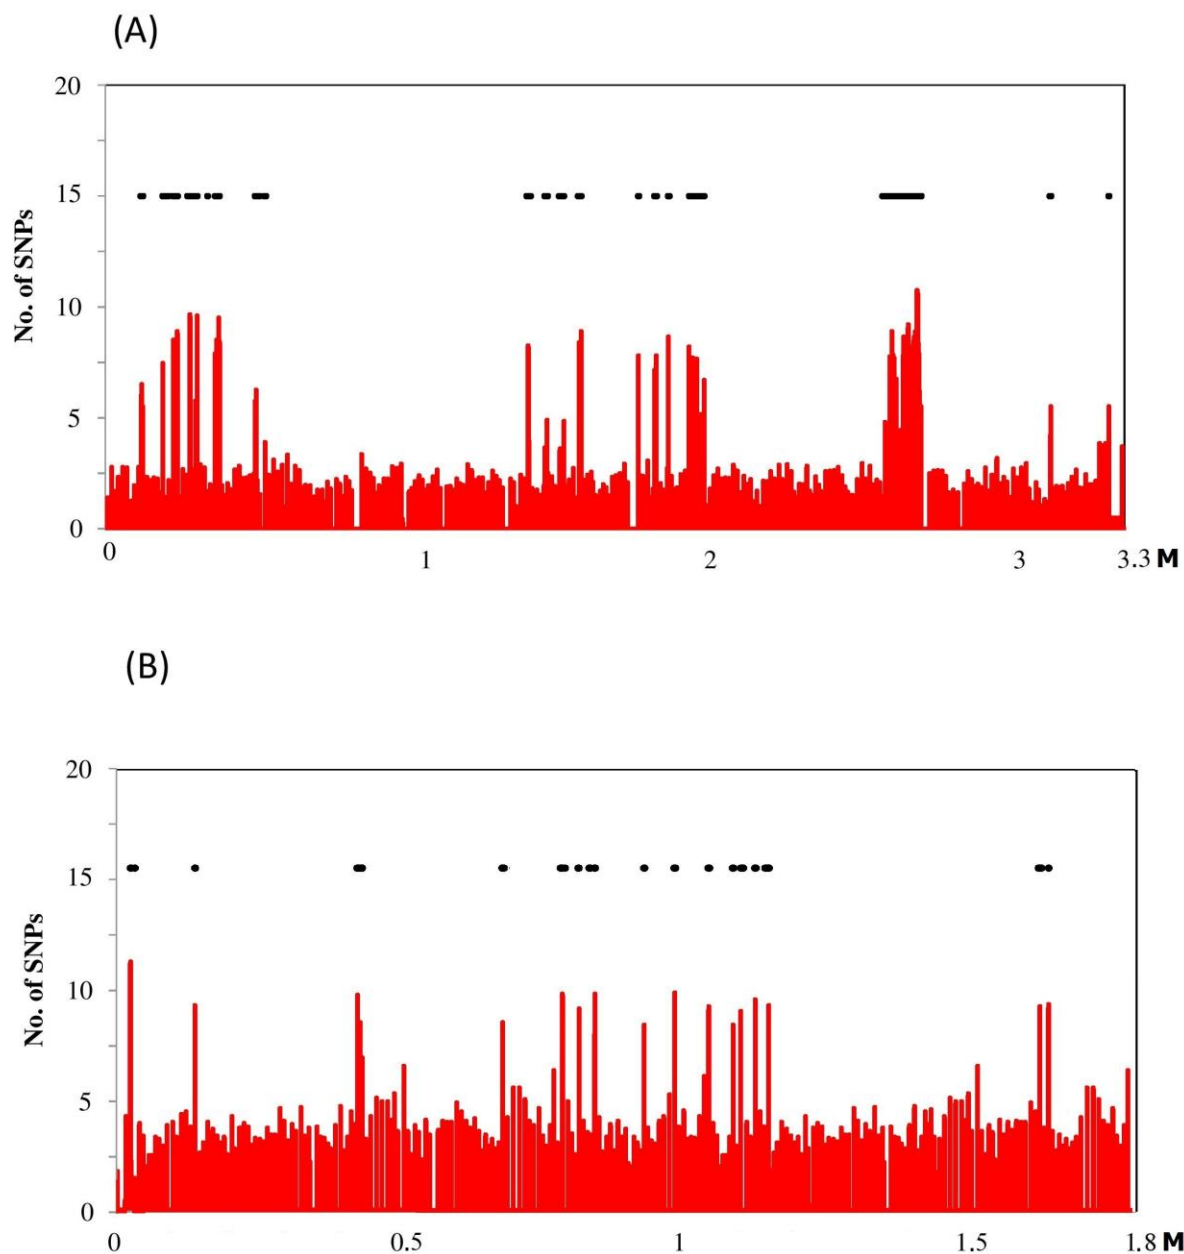

**Supplementary Figure 2.** Positions of recombinant regions in chromosome I (A) and II (B) based on the *V. parahaemolyticus* reference genome FDA\_R31. The X-axis indicated the genomic position in chromosome I (A) and II (B). Recombinant segments are detected by RDP3 and indicated as horizontal black lines spanning regions. The red lines indicated the SNP density, which represented the average number of SNPs among 102 genomes counted within 10-kb windows across the chromosome.

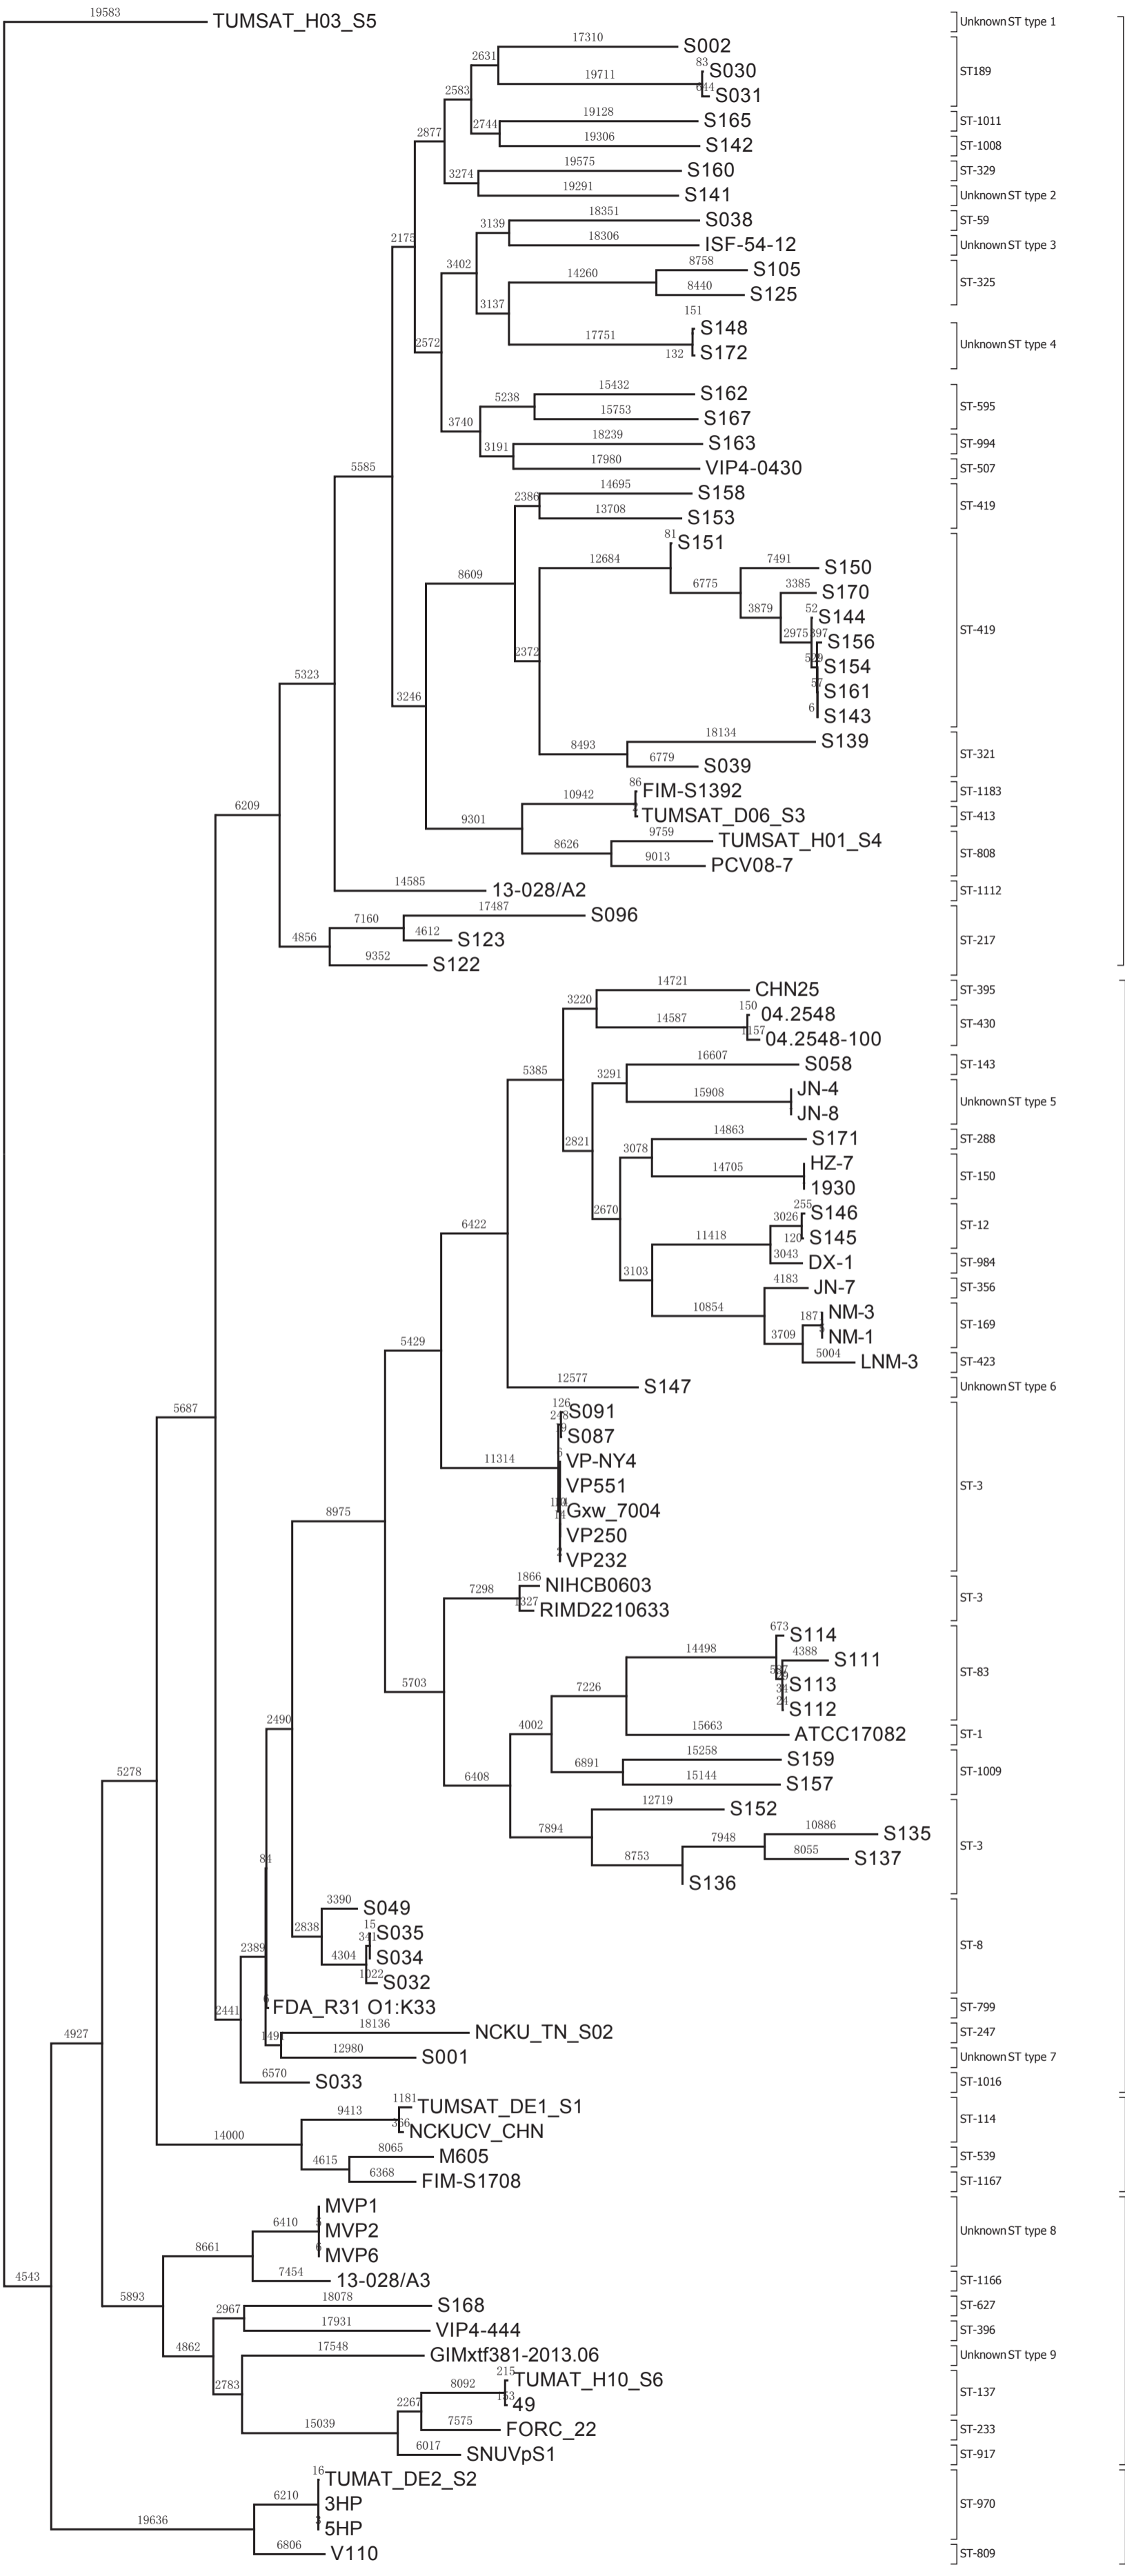

- UnknownST type 1
- ST189
- ST-1011
- ST-1008
- ST-329
- UnknownST type 2
- ST-59
- UnknownST type 3
- ST-325
- UnknownST type 4
- ST-595
- ST-994
- ST-507
- ST-419
- Clade I
- ST-419
- ST-321
- ST-1183
- ST-413
- ST-808
- ST-1112
- ST-217
- ST-395
- ST-430
- ST-143
- UnknownST type 5
- ST-288
- ST-150
- ST-12
- ST-984
- ST-356
- ST-169
- ST-423
- UnknownST type 6
- ST-3
- Clade II
- ST-3
- ST-83
- ST-1
- ST-1009
- ST-3
- ST-8
- ST-799
- ST-247
- UnknownST type 7
- ST-1016
- ST-114
- ST-539
- ST-1167
- UnknownST type 8
- ST-1166
- ST-627
- ST-396
- UnknownST type 9
- ST-137
- ST-233
- ST-917
- ST-970
- Clade V
- ST-809

10000

**Supplementary Figure 3.** Comparison of MLST typing with core genome typing. The STs were indicated in the right-hand side of Maximum-parsimony tree of *V. parahaemolyticus* genomes.

(A)

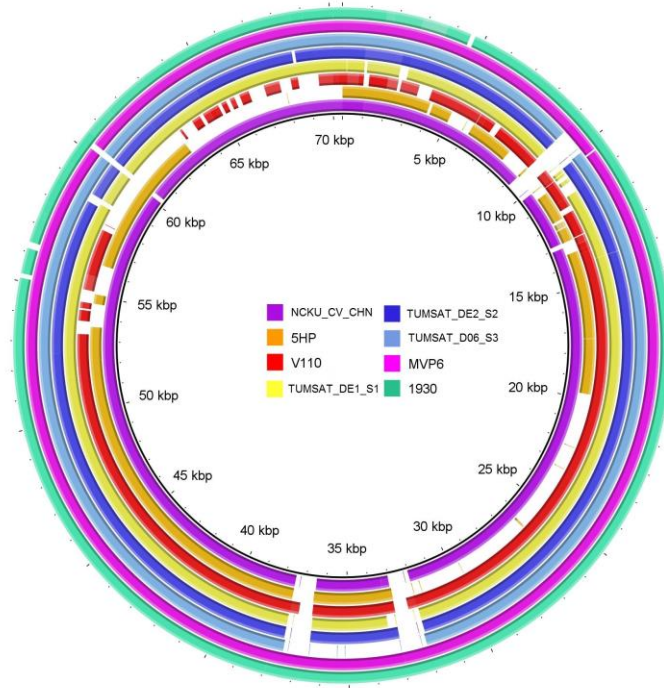

(B)

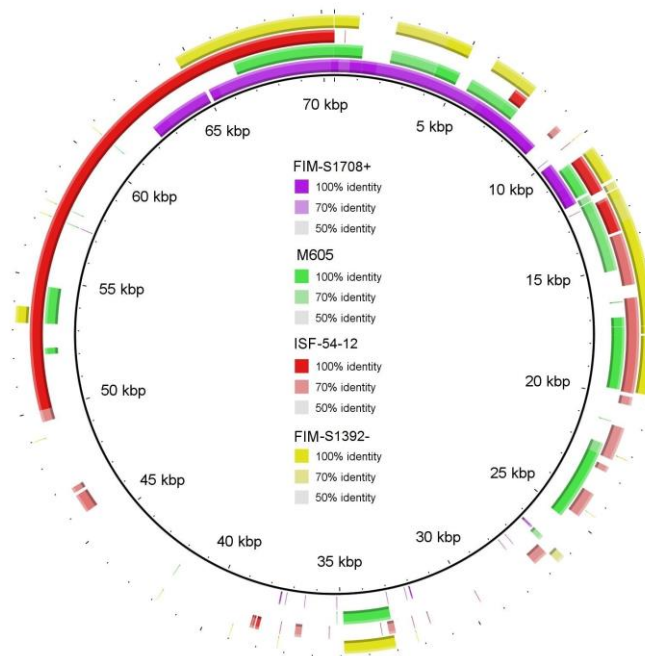

(C)

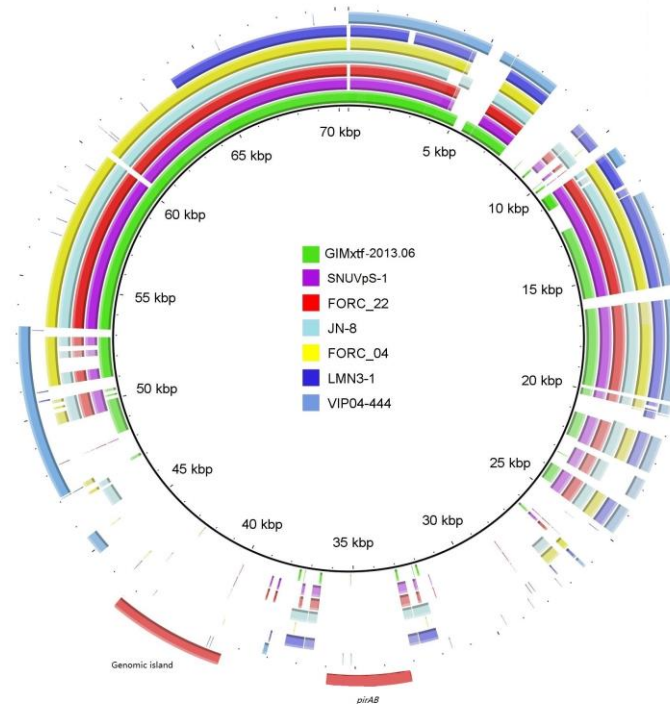

(D)

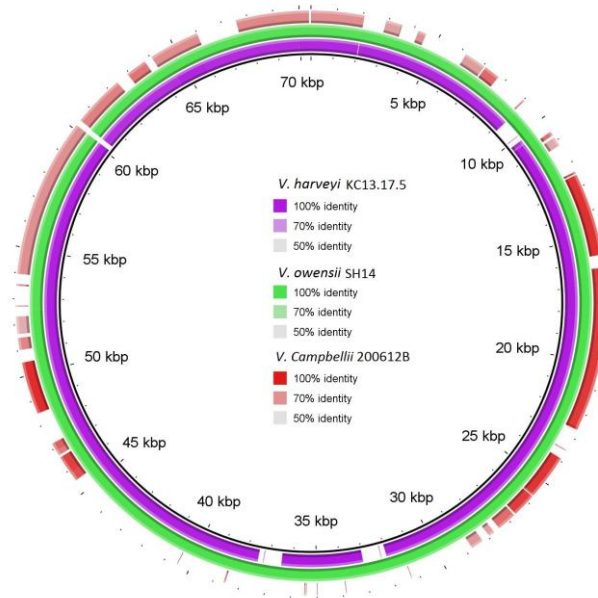

**Supplementary Figure 4.** Multiple genome comparisons using BRIG with pVA-1 as the reference. Multiple genome comparisons of plasmids from AHPND related isolates in Asian (A); Multiple genome comparisons of plasmids from AHPND related isolates in Mexico and Canada (B); Multiple genome comparisons of pVA-1 like plasmids from non-AHPND related isolates (C); the positions of genomic island



and *pirAB* were indicated in outer ring; Multiple genome comparisons of plasmids from other *Vibrio* sp. (D). Coloured rings indicate the sequence similarity between different genomes.
